# Supplementary material for: New Insights Into the Structure of Hydroxylated and Alkylated Glycols: A Comparative X-ray Diffraction, Raman and Molecular Dynamics Study of Ethane-1,2-Diol, 2-Methoxyethan-1-ol and 1,2-Dimethoxy Ethane
Source: Preprints.org preprint supplement (doi:10.20944/preprints202010.0071.v1), 2020-10-05
Supplement: Supplementary file 3 [file supplementary]

Supporting Information

New insights into the structure of hydroxylated and alkylated glycols: a comparative X-ray diffraction, Raman and molecular dynamics study of ethane-1,2-diol, 2-methoxyethan-1-ol and 1,2-dimethoxy ethane

Lorenzo Gontrani 1,2, *, Pietro Tagliatesta 2, Antonio Agresti 3, Sara Pescetelli 3 and Marilena Carbone 2,*

1 Dept. of Chemistry, University of Rome La Sapienza, P. le A. Moro, 00185 Roma, Italy

2 Dept. of Chemical Science and Technologies, University of Rome, Tor Vergata, Via della Ricerca Scientifica-1, 00133 Roma, Italy

3 Dept. of Electronic Engineering, University of Rome Tor Vergata, Via del Politecnico 1, 00133 Roma, Italy

***** Correspondence: marilena.carbone@uniroma2.it; lorenzo.gontrani@uniroma2.it.

**
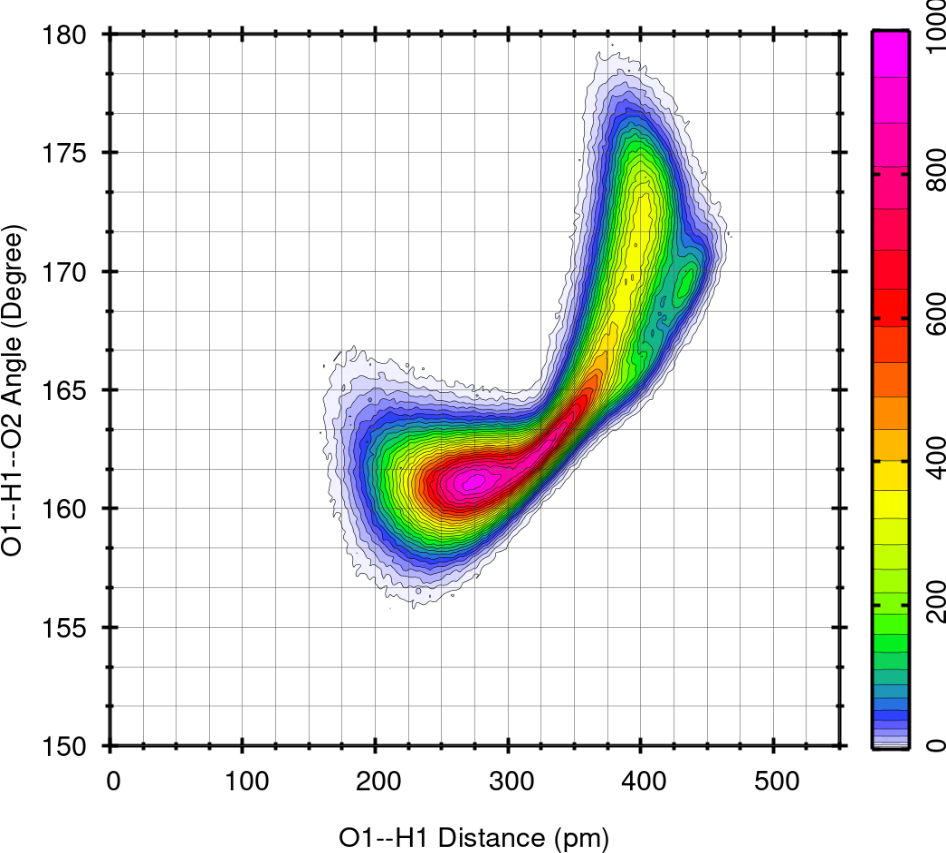
**

Figure S1 ME: Combined radial and angular distribution function for intramolecular H- bond

*
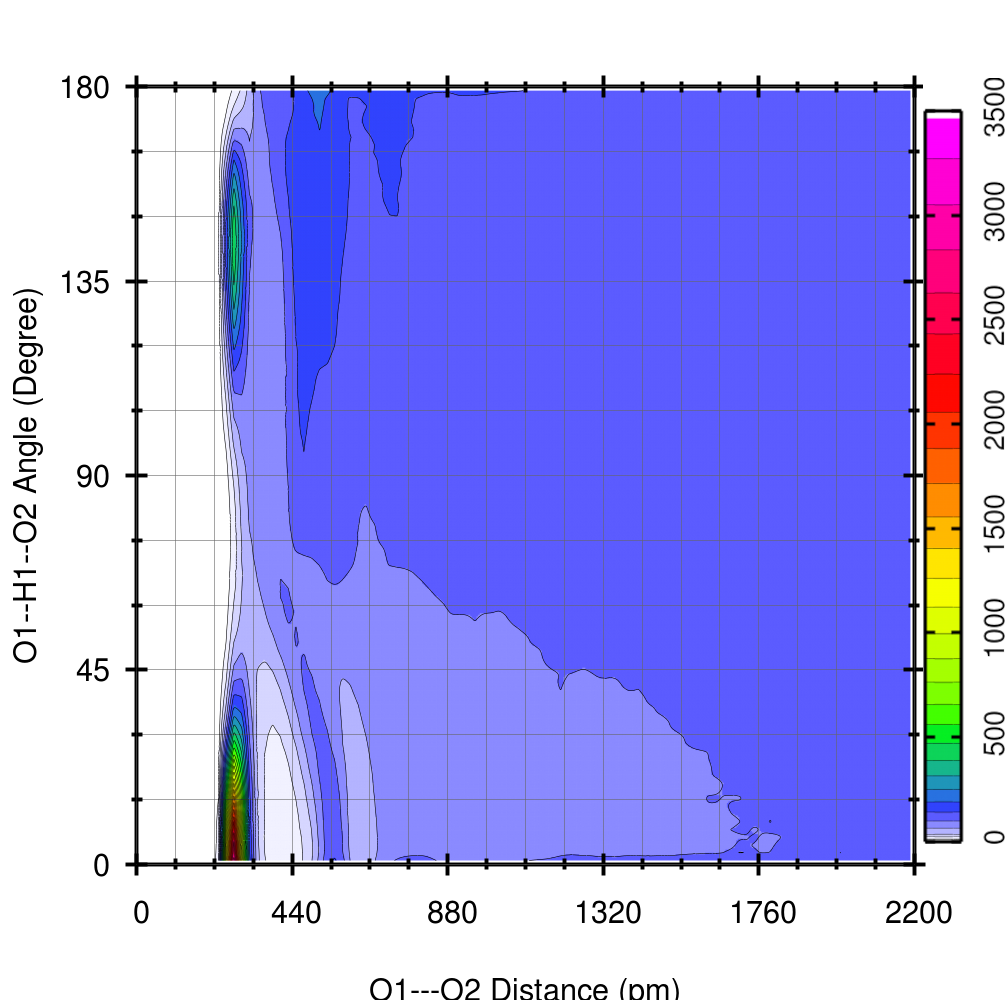
*

*Figure S2 EG: Combined radial and angular distribution function for intermolecular H-bond*
